# Supplementary material for: Detection of chronic lymphocytic leukemia subpopulations in peripheral blood by phage ligands of tumor immunoglobulin B cell receptors
Source: PubMed Central journal article supplement (PMC7862058; doi:10.1038/s41375-020-0885-y), 2020-06-01
Supplement: 41375_2020_885_MOESM2_ESM.pdf [file 41375_2020_885_MOESM2_ESM.pdf]

**Supplementary Table S1. Clinical and laboratory data of patients CLL#1 and CLL#5.**

Patients CLL#1 and CLL#5 were clinically followed for 2 years, and peripheral blood samples were collected at the indicated time. At the diagnosis, CLL#1 patient counted 98% CD19/CD5 positive B cells, and CLL#5 patient counted 82% CD19/CD5 positive B cells.

Definition of CLL stage was according to Binet classification (Cancer.Net Editorial Board, 10/2017). Cytogenetic analysis was performed using Fluorescent in situ hybridization (FISH) with probes XL p53/LSI ATM and XL DLEU/LAMP/12cen (MetaSystems). WBC, white blood cells.

| Patient                         | Sample (collection time) | WBC                     | Binet stage | Cytogenetics | Therapy                               |
|---------------------------------|--------------------------|-------------------------|-------------|--------------|---------------------------------------|
| CLL#1<br>65-years old<br>male   | CLL#1a (month 1)         | 40,410/mm <sup>3</sup>  | A           | Del13q14     | None                                  |
|                                 | CLL#1b (month 5)         | 69,070/mm <sup>3</sup>  | A           |              | None                                  |
|                                 | CLL#1c (month 8)         | 92,670/mm <sup>3</sup>  | C           |              | rituximab-bendamustine (for 6 months) |
|                                 | CLL#1d (month 24)        | 6,700/mm <sup>3</sup>   | A           |              | None                                  |
| CLL#5<br>80-years old<br>female | CLL#5a (month 1)         | 57,210/mm <sup>3</sup>  | A           | Del13q14     | None                                  |
|                                 | CLL#5b (month 12)        | 119,000/mm <sup>3</sup> | A           |              | None                                  |
|                                 | CLL#5c (month 24)        | 86,500/mm <sup>3</sup>  | A           |              | None                                  |
